# Supplementary material for: Proceeding of catalytic water splitting on Cu/Ce@g-C3N4 photocatalysts: an exceptional approach for sunlight-driven hydrogen generation
Source: Royal Society of Chemistry journal article supplement (doi:10.1039/d4nr00111g), 2024-01-01
Supplement: d4nr00111g1.pdf [file d4nr00111g1.pdf]

## Supporting information

### **Proceeding of catalytic water splitting on Cu/Ce@g-C<sub>3</sub>N<sub>4</sub> photocatalysts: an exceptional approach for sun light driven hydrogen generation†**

Muhammad Zeeshan Abid<sup>a</sup>, Aysha Tanveer<sup>a</sup>, Khezina Rafiq<sup>a\*</sup>, Abdul Rauf<sup>a</sup>, Rongchao Jin<sup>b</sup>, Ejaz Hussain<sup>ab\*</sup>

<sup>a</sup>Institute of Chemistry, Inorganic Materials Laboratory 52S, The Islamia University of Bahawalpur-63100, Pakistan

<sup>b</sup>Department of Chemistry, Carnegie Mellon University, Pittsburgh Pennsylvania-15213, United States

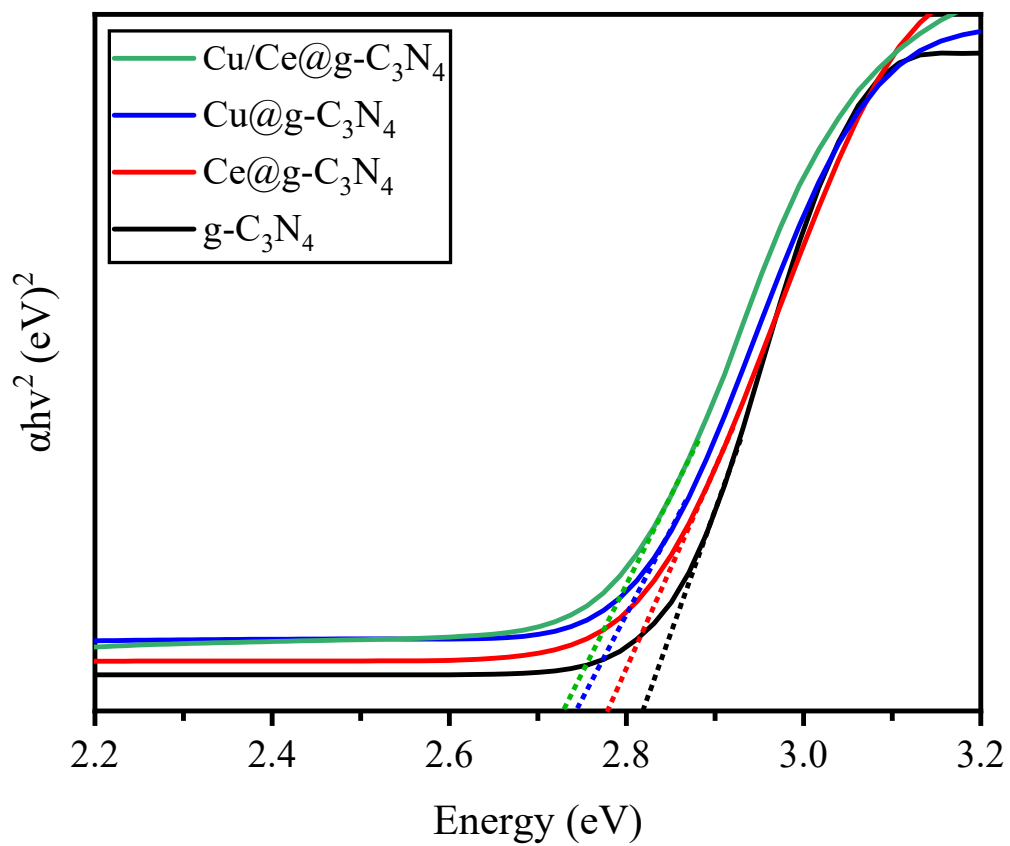

**Figure S1:** Bandgap energies of  $\text{g-C}_3\text{N}_4$ ,  $\text{Ce@g-C}_3\text{N}_4$ ,  $\text{Cu@g-C}_3\text{N}_4$ ,  $\text{Cu/Ce@g-C}_3\text{N}_4$  catalysts calculated using Tauc plot method.

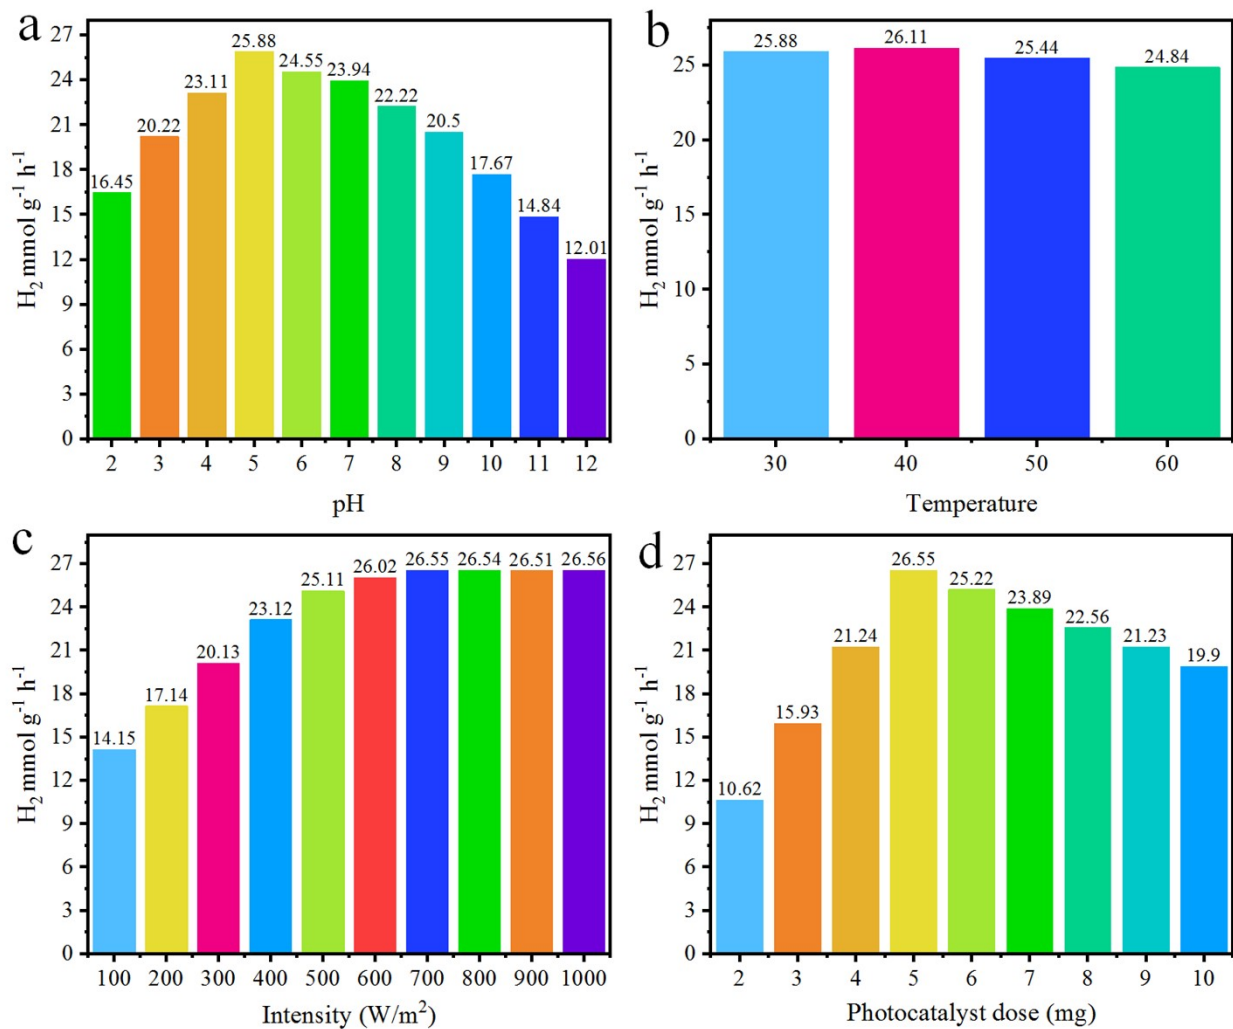

**Figure S2:** a) Effect of pH b) temperature c) light intensity and d) correspond to the effect of photocatalyst dose on hydrogen production rate.

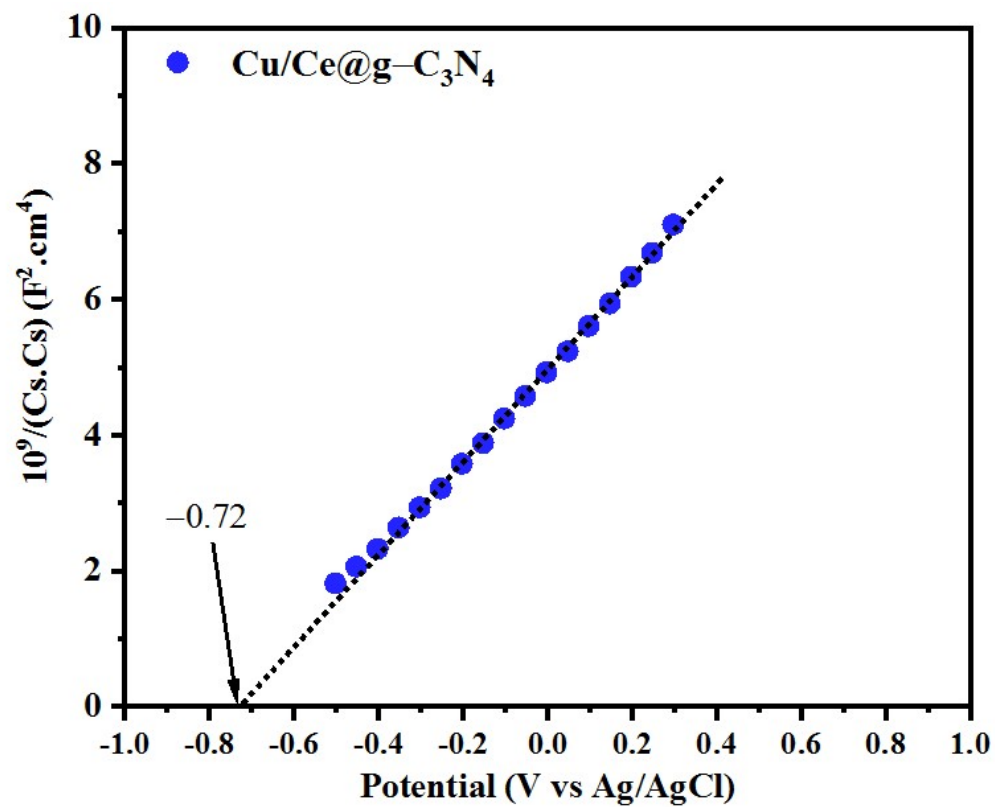

Figure S3: Mott-schottky plot of Cu/Ce@g-C<sub>3</sub>N<sub>4</sub> catalysts.

**Table S1: Crystalline sizes and band gap energies of as-synthesized catalysts.**

| <b>Photocatalysts</b>                 | <b>2θ</b> | <b>D(nm)</b> | <b>Band gap (eV)</b> |
|---------------------------------------|-----------|--------------|----------------------|
| g-C <sub>3</sub> N <sub>4</sub>       | 27.21     | 28.25        | 2.82                 |
| Cu@g-C <sub>3</sub> N <sub>4</sub>    | 27.21     | 27.88        | 2.78                 |
| Ce@g-C <sub>3</sub> N <sub>4</sub>    | 27.20     | 27.95        | 2.74                 |
| Cu/Ce@g-C <sub>3</sub> N <sub>4</sub> | 27.20     | 27.45        | 2.72                 |

**Table S2: The hydrogen evolution performances of as-synthesized catalysts.**

| <b>Sr. No.</b> | <b>Photocatalyst</b>                    | <b>H<sub>2</sub> mmol g<sup>-1</sup> h<sup>-1</sup></b> |
|----------------|-----------------------------------------|---------------------------------------------------------|
| 1              | g-C <sub>3</sub> N <sub>4</sub>         | 4.34± 0.04                                              |
| 2              | 2%Cu@g-C <sub>3</sub> N <sub>4</sub>    | 9.37± 0.37                                              |
| 3              | 2%Ce@g-C <sub>3</sub> N <sub>4</sub>    | 11.91± 0.62                                             |
| 4              | 2%Cu/Ce@g-C <sub>3</sub> N <sub>4</sub> | 23.94± 0.70                                             |

**Table S3: Effect of pH on hydrogen evolution performances of Cu/Ce@g-C<sub>3</sub>N<sub>4</sub> photocatalysts.**

| <b>Sr. No.</b> | <b>pH</b> | <b>H<sub>2</sub> mmol g<sup>-1</sup> h<sup>-1</sup></b> |
|----------------|-----------|---------------------------------------------------------|
| 1              | 2         | 16.45                                                   |
| 2              | 3         | 20.22                                                   |
| 3              | 4         | 23.11                                                   |
| 4              | 5         | 25.88                                                   |
| 5              | 6         | 24.55                                                   |
| 6              | 7         | 23.94                                                   |
| 7              | 8         | 22.22                                                   |
| 8              | 9         | 20.5                                                    |
| 9              | 10        | 17.67                                                   |
| 10             | 11        | 14.84                                                   |
| 11             | 12        | 12.01                                                   |

**Table S4: Effect of temperature on photocatalytic activity of Cu/Ce@g-C<sub>3</sub>N<sub>4</sub> photocatalysts.**

| <b>Sr. No.</b> | <b>Temperature (°C)</b> | <b>H<sub>2</sub> mmol g<sup>-1</sup> h<sup>-1</sup></b> |
|----------------|-------------------------|---------------------------------------------------------|
| 1              | 30                      | 25.88                                                   |
| 2              | 40                      | 26.11                                                   |
| 3              | 50                      | 25.44                                                   |
| 4              | 60                      | 24.84                                                   |

**Table S5: Effect of light intensity on photocatalytic activity of Cu/Ce@g-C<sub>3</sub>N<sub>4</sub> photocatalysts.**

| <b>Sr. No.</b> | <b>Light intensity (W/m<sup>2</sup>)</b> | <b>H<sub>2</sub> mmol g<sup>-1</sup> h<sup>-1</sup></b> |
|----------------|------------------------------------------|---------------------------------------------------------|
| 1              | 100                                      | 14.15                                                   |
| 2              | 200                                      | 17.14                                                   |
| 3              | 300                                      | 20.13                                                   |
| 4              | 400                                      | 23.12                                                   |
| 5              | 500                                      | 25.11                                                   |
| 6              | 600                                      | 26.02                                                   |
| 7              | 700                                      | 26.55                                                   |
| 8              | 800                                      | 26.54                                                   |
| 9              | 900                                      | 26.51                                                   |
| 10             | 1000                                     | 26.56                                                   |

**Table S6: Effect of catalyst dosage on photocatalytic activity of Cu/Ce@g-C<sub>3</sub>N<sub>4</sub> photocatalysts.**

| <b>Sr. No.</b> | <b>Catalyst dose (mg)</b> | <b>H<sub>2</sub> mmol g<sup>-1</sup> h<sup>-1</sup></b> |
|----------------|---------------------------|---------------------------------------------------------|
| 1              | 2                         | 10.62                                                   |
| 2              | 3                         | 15.93                                                   |
| 3              | 4                         | 21.24                                                   |
| 4              | 5                         | 26.55                                                   |
| 5              | 6                         | 25.22                                                   |
| 6              | 7                         | 23.89                                                   |
| 7              | 8                         | 22.56                                                   |
| 8              | 9                         | 21.23                                                   |
| 9              | 10                        | 19.9                                                    |
